# Supplementary material for: Exploring Risk Perception and Attitudes to Miscarriage and Congenital Anomaly in Rural Western Kenya
Source: PLoS One. 2013 Nov 13;8(11):e80551. doi: 10.1371/journal.pone.0080551 (PMC3827434; doi:10.1371/journal.pone.0080551)
Supplement: Table S1 — Main themes and sub-themes used in the thematic analysis for exploring risk perception and attitudes to miscarriage and congenital anomaly. (PDF) [file pone.0080551.s001.pdf]

**Table S1. Main themes and sub-themes used in the thematic analysis for exploring risk perception and attitudes to miscarriage and congenital anomaly**

| <b>Themes</b>             | <b>Sub-themes</b>                                                                                   |
|---------------------------|-----------------------------------------------------------------------------------------------------|
| Causes                    | Biomedical                                                                                          |
|                           | Illnesses<br>Medications<br>Stress<br>Hereditary                                                    |
|                           | Cultural                                                                                            |
|                           | Not conforming to traditional norms<br>Infidelity<br>Curse                                          |
|                           | None                                                                                                |
| Stigma                    | Stigmatisation                                                                                      |
|                           | Hide child with abnormality<br>Isolate woman who had a miscarriage<br>Blame/Gossip<br>No disclosure |
|                           | No stigma                                                                                           |
|                           | Accept child with a congenital anomaly<br>Freely disclose adverse pregnancy outcome                 |
| Health-seeking behaviours | Health facility                                                                                     |
|                           | Traditional                                                                                         |
|                           | TBA<br>Spiritual healer<br>Herbal remedies                                                          |
|                           | Family                                                                                              |
|                           | Husband<br>Parents in law<br>Grand-mother                                                           |
|                           | None                                                                                                |
